# Supplementary material for: Zika virus dynamics: Effects of inoculum dose, the innate immune response and viral interference
Source: PubMed Central journal article supplement (PMC7817008; doi:10.1371/journal.pcbi.1008564), 2021-01-20
Supplement: pcbi.1008564.s027.pdf [file pcbi.1008564.s027.pdf]

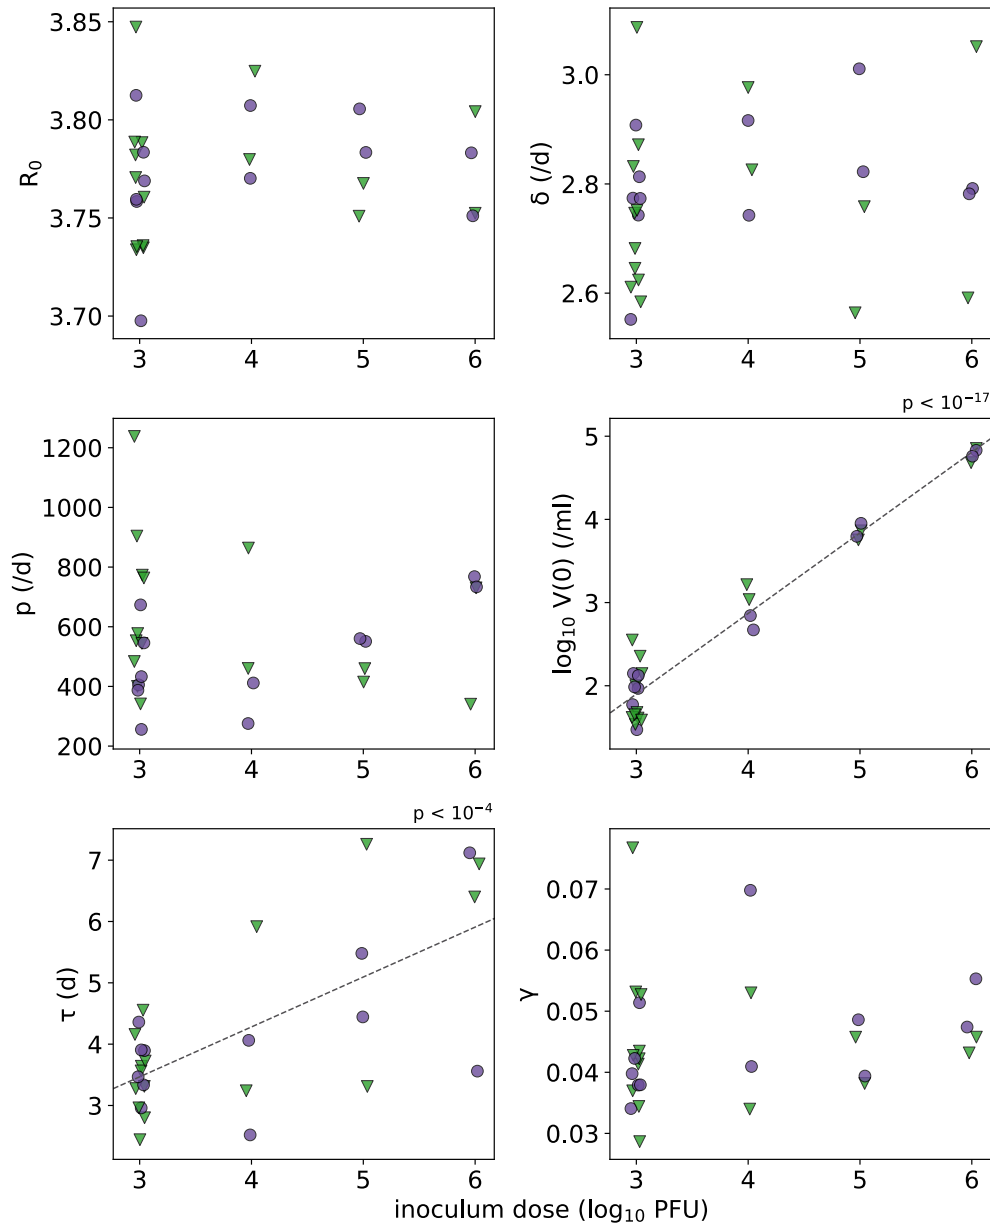

### Supplementary Figure 19

Relationships between individual estimated parameters and inoculum dose, with individual estimated parameters from the innate immune model with reduced viral production rate (Eq. 2) with fixed  $k = 8 \text{ d}^{-1}$ , fixed  $c = 10 \text{ d}^{-1}$ , fixed  $s = 1 \text{ d}^{-1}$  and fixed  $\alpha = 2 \text{ d}^{-1}$ , and with dose-dependencies in  $\log_{10} V_0$  and in  $\tau$  explicitly incorporated (Supplementary Table 6). Correlations between parameters and inoculum dose are assessed via the Pearson correlation, and where this is significant after Bonferroni correction the linear regression line is shown (dashed) and the  $p$ -value is shown above the panel. Markers for individual animals are colored by the viral strain (BR: green triangles, PR: purple circles).
