# Supplementary material for: Zika virus dynamics: Effects of inoculum dose, the innate immune response and viral interference
Source: PLOS journal article supplement (doi:10.1371/journal.pcbi.1008564), 2021-01-20
Supplement: S33 (10.1371/journal.pcbi.1008564.s033) [file journal.pcbi.1008564.s033]

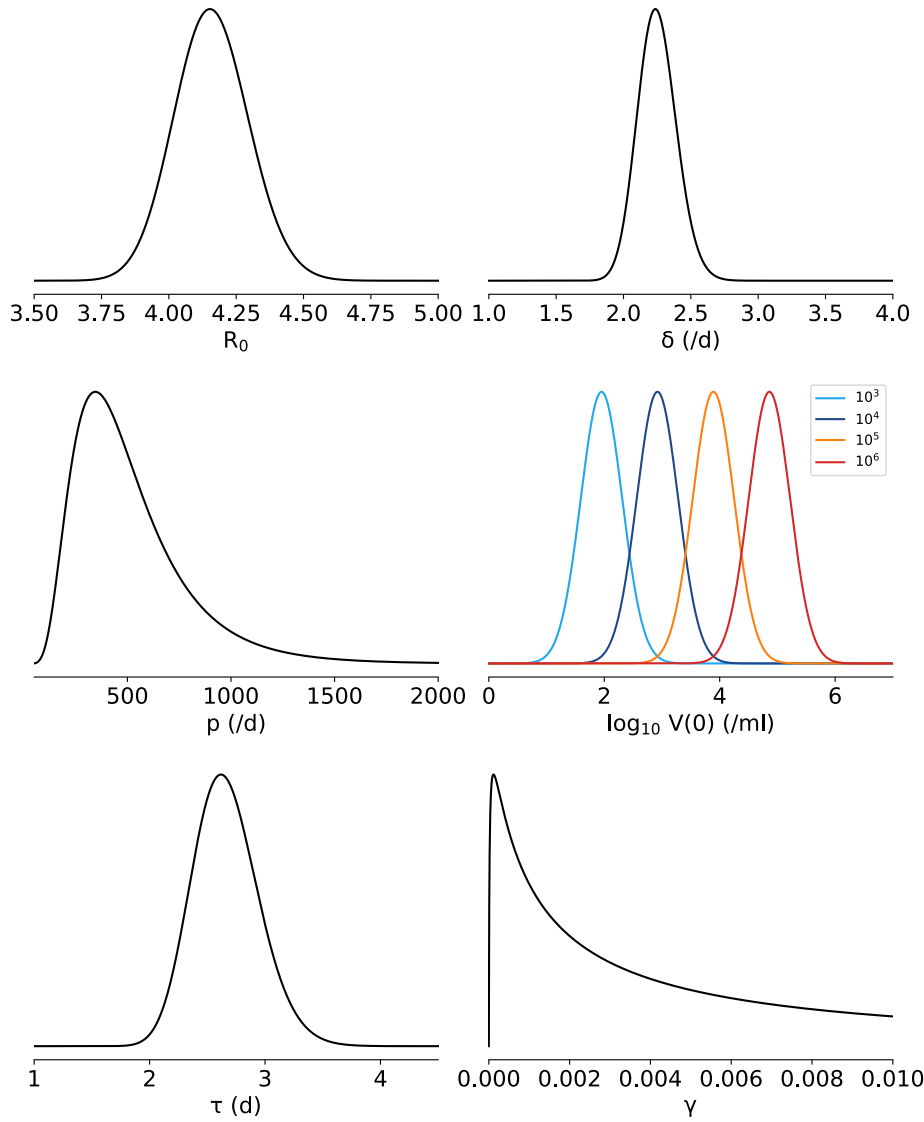

### Supplementary Figure 25

Estimated parameter distributions from the viral interference model (Eq. 3) with fixed  $k = 8 \text{ d}^{-1}$ , fixed  $c = 10 \text{ d}^{-1}$ , fixed  $s = 1 \text{ d}^{-1}$ , fixed  $\alpha = 2 \text{ d}^{-1}$ , fixed  $K = 10^3$  and fixed  $n = 0.25$ , and with a dose-dependency in  $\log_{10} V_0$  explicitly incorporated (Table 1). Inoculum dose indicated by color where relevant (light blue =  $10^3$  PFU, dark blue =  $10^4$  PFU, orange =  $10^5$  PFU, red =  $10^6$  PFU).
