# Supplementary material for: Zika virus dynamics: Effects of inoculum dose, the innate immune response and viral interference
Source: PLOS journal article supplement (doi:10.1371/journal.pcbi.1008564), 2021-01-20
Supplement: S38 (10.1371/journal.pcbi.1008564.s038) [file journal.pcbi.1008564.s038]

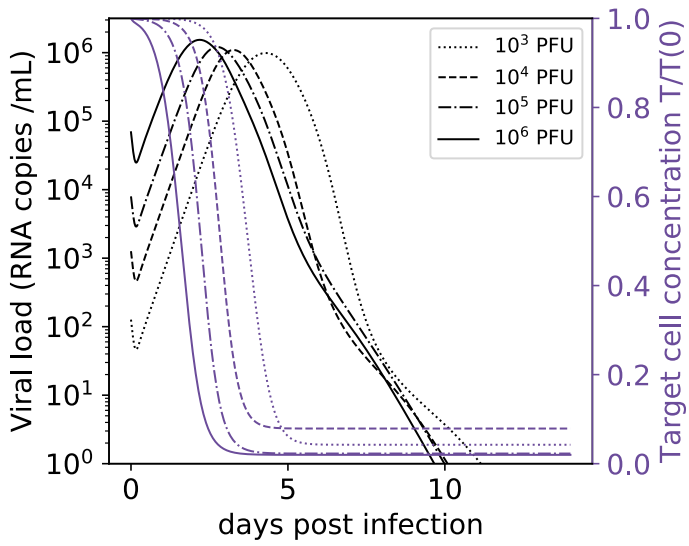

### Supplementary Figure 30

The mean predicted viral load (left axis, black) and mean predicted target cell concentration normalised by  $T(0)$  (purple, right axis) at each dose group, from the innate immune model with restricted viral production and viral interference (Eq. 3, Table 1).
